1 **Increased calcidiol level in redhaired people: Could redheadedness be an adaptation to**  
2 **temperate climate?**

3

4 Jaroslav Flegr<sup>a\*</sup>, Kateřina Sýkorová<sup>a</sup>, Vojtěch Fiala<sup>a</sup>, Jana Hlaváčková<sup>a</sup>, Marie Bičíková<sup>a</sup>,  
5 Ludmila Máčová<sup>a</sup>, Šárka Kaňková<sup>a</sup>

6

7 <sup>a</sup> Department of Biology, Faculty of Science, Charles University in Prague, Prague, Viničná  
8 7, 128 44, Czech Republic

9 <sup>b</sup> Institute of Endocrinology, Prague, Czech Republic

10

11 **Short title:** Vitamin D and redheadedness

12

13 \* **Corresponding author:** *Jaroslav Flegr, Laboratory of Evolutionary Biology, Department*  
14 *of Philosophy and History of Sciences, Faculty of Science, Charles University, Vinicna 7, 128*  
15 *00 Prague 2, Czech Republic, Tel: +(420)221951821, e-mail: flegr@cesnet.cz*

16 *Orcid: 0000-0002-0822-0126*

17

18

19 **Abstract** About 1–2% of European population are redhaired, meaning they synthesize more  
20 pheomelanin than eumelanin, the main melanin pigment. Several mutations could be  
21 responsible for this phenotype. It has been suggested that corresponding mutations spread in  
22 Europe due to a founder effect shaped either by a relaxation of selection for dark, UV-  
23 protective phenotypes or by sexual selection in favor of rare phenotypes. In our study, we  
24 investigated the levels of vitamin D precursor calcidiol and folic acid in the blood serum of  
25 73 redhaired and 130 non-redhaired individuals. In redhaired individuals, we found higher  
26 calcidiol concentrations and approximately the same folic acid concentrations as in non-  
27 redhaired subjects. Calcidiol concentrations correlated with the intensity of hair redness  
28 measured by two spectrophotometric methods and estimated by participants themselves and  
29 by independent observers. In non-redhaired individuals, calcidiol levels covaried with the  
30 amount of sun exposure and intensity of suntan while in redhaired individuals, this was not  
31 the case. It suggests that increased calcidiol levels in redhaired individuals are due to  
32 differences in physiology rather than in behavior. We also found that folic acid levels  
33 increased with age and the intensity of baldness and decreased with the frequency of visiting  
34 tanning salons. Our results suggest that the redhaired phenotype could be an evolutionary  
35 adaptation for sufficient photosynthesis of provitamin D in conditions of low intensity of UV-  
36 B radiation in central and northern parts of Europe.

37 **Keywords:** Vitamin D; UV-B; evolution; human evolution; pigmentation; baldness.

38

## 39 **Introduction**

40 On average, less than 2% of all Europeans (but 6–13% of population of Ireland, Wales, and  
41 Scotland) express the redhaired phenotype (Hooton, 1940; Sunderland & Barnicot, 1956).  
42 Mutations in the gene for receptor protein *MC1R* responsible for the absence or low levels of  
43 eumelanin in the affected subjects probably spread in human populations after the arrival of  
44 modern *Homo sapiens* to Europe. Nevertheless, the most common allele, Val92Met, seems to  
45 have introgressed into our gene pool from *Homo neanderthalensis* (Ding et al., 2014). It has  
46 been speculated that these alleles spread due to sexual selection, in particular by selection in  
47 favor of a rare phenotype (Frost, 2006; Frost, Kleisner, & Flegr, 2017). Many anecdotal  
48 observations (Chen et al., 2017; Liem, Hollensead, Joiner, & Sessler, 2006; Missmer et al.,  
49 2006; Somigliana et al., 2010; Tell-Marti et al., 2015) and one systematic largescale study  
50 (Frost et al., 2017) reveal that redhaired persons, especially women, tend to suffer from

51 various symptoms of impaired health and from a higher frequency of certain diseases,  
52 including colorectal, cervical, uterine, and ovarian cancer than their non-redhaired peers. It  
53 has been suggested that the resulting selection against redhaired individuals counterbalances  
54 the positive sexual selection in favor of redhaired women, thereby maintaining the  
55 corresponding alleles at a low but stable frequency (Frost et al., 2017). Another study which  
56 used a similar population later showed that it is not the red hair as such but rather the pale  
57 skin frequently associated with redhaired phenotype that is responsible for the observed signs  
58 of impaired health of redhaired persons (Flegr & Sykороva, 2019). Pale skin can be the result  
59 of either congenitally low eumelanin concentrations in the skin or a sign of absence of suntan,  
60 usually due to avoidance of sun exposure (A. T. Slominski, Kim, Li, & Tuckey, 2016). The  
61 authors suggest that the impaired health (Skobowiat, Postlethwaite, & Slominski, 2017; A.  
62 Slominski & Postlethwaite, 2015) observed primarily in pale-skinned individuals and  
63 secondarily also in many redheaded persons is caused either by photolysis of folic acid in  
64 naturally pale individuals or by insufficient photosynthesis of vitamin D in persons who are  
65 pale due to avoidance of sun exposure. No direct data concerning the concentration of folic  
66 acid in pale-skinned or redhaired participants of that study (Flegr & Sykороva, 2019) were  
67 available. Rather surprisingly, we have not been able to find information about vitamin D and  
68 folic acid concentrations in redhaired individuals elsewhere in scientific literature either.

69 The aim of the present case-control study performed on a population of 203 subjects (73 of  
70 whom are redhaired) was to test the proposed hypotheses by searching for possible  
71 correlations between the intensity of natural hair redness, natural and by sun exposure  
72 acquired skin tone, and calcidiol and folic acid concentrations. In previous studies, the  
73 intensity of hair redness was rated by subjects themselves. To check the reliability of such  
74 data and their usefulness for future studies, we compared self-rated hair redness, redness  
75 rated by two independent observers, and exact measurements acquired by two different  
76 spectrophotometric methods.

77

## 78 **Materials and Methods**

79 The project included a laboratory investigation which took place at the Faculty of Science of  
80 Charles University in Prague on September 17 – October 3, 2018. The second part, an online  
81 questionnaire survey, was completed by the same set of participants within the following 35  
82 days.

83 *Participants*

84 Participants were recruited mostly via a Facebook-based snowball method. Initially, an  
85 invitation to participate in a “study of health and personality of redheads” was posted on the  
86 timeline of the Facebook page Labbunnies, an approximately 18,000-strong group of Czech  
87 and Slovak nationals willing to participate in evolutionary psychology experiments. Further  
88 recruitment of redheads was carried out by invitations on Facebook, selective invitation of  
89 registered members of Labbunnies who completed our earlier questionnaires on the scale of  
90 redheadedness and scored four to six on a six-point scale, and by handing out flyers in the  
91 streets of Prague to people looked like natural redheads. We invited only people who  
92 confirmed that they had not dyed or bleached their hair for at least six months. This enabled  
93 us to measure natural hair color near the hair roots. Only subjects who provided informed  
94 consent were included in the study. In the end, we assembled a sample of 110 women and 93  
95 men. Participants received no remuneration, only a commemorative badge and a haircare gift  
96 set (costing 53 CZK, that is app. 2.3 USD). The project was approved by the Ethics  
97 Committee of the Faculty of Science, Charles University (No. 2018/30).

98 *Experimental design*

99 Participants were instructed to wash their hair the evening before or morning of the day of the  
100 laboratory measurement and to refrain from using any post-shampoo products. At the  
101 beginning of the session, participants obtained a paper questionnaire, which they could  
102 complete while waiting for individual measurements. First, participants were tested with an  
103 electronic dynamometer (not part of the present study). Then we measured the natural red  
104 color of participants’ hair and their skin hue by using a spectrophotometer to obtain a  
105 standardized scale of redheadedness and skin hue. Subsequently, participants were tested  
106 with a mechanical dynamometer. While the dynamometer and spectrophotometer  
107 measurements were performed in two separate rooms, two observers (a woman and a man)  
108 independently rated the intensity of subjects’ redheadedness and freckledness using an  
109 ordinal scale of zero to five. At the end of the laboratory part of the study, we asked  
110 participants if they consent to having a blood sample taken to determine the concentration of  
111 calcidiol and folic acid. The sampling was performed in an adjacent room by a qualified  
112 nurse. Several days after the laboratory part of the study, we sent all participants a link to  
113 another electronic questionnaire with a request to complete it within the following 35 days.  
114 After two rounds of e-mail reminders, 198 (97.5%) of participants completed this  
115 questionnaire.

116 *Questionnaires*

117 All participants were asked to complete one printed questionnaire and one electronic  
118 questionnaire, distributed via Qualtrics platform, which aimed at collecting their basic  
119 anamnestic information and information related to their and their relatives' hair and body  
120 pigmentation, as well as their tanning or sun-avoidance behaviors. Specifically, we asked the  
121 participants to rate the following:

- 122 – natural redness of their hair and hair color in childhood on a six-point scale anchored with  
123 “absolutely non-red” (code 1) – “bright red” (code 6);
- 124 – natural lightness of their hair and complexion on a six-point scale anchored with “very  
125 light” (code 1) – “very dark” (code 6);
- 126 – hair length on a four-point scale anchored with “very short, does not cover the forehead,  
127 ears, or neck” (code 1) – “medium length or long, covering forehead, ears, and neck,  
128 mostly worn loose” (code 4);
- 129 – intensity of baldness on a seven-point scale, where degrees were shown by black and white  
130 pictures (no responder chose code 7, the highest degree of baldness);
- 131 – current intensity of suntan on a six-point scale anchored with “no suntan” (code 1) – “very  
132 dark suntan” (code 6);
- 133 – tendency to tan to brown and tendency to tan to red on six-point scales anchored with  
134 “definitely not” (code 1) – “definitely yes” (code 6);
- 135 – intensity of chemical self-protection from sun by creams or oils with UV filters, intensity of  
136 self-protection by mechanical means (by shelters and clothing) on six-point scales  
137 anchored with “not at all” (code 1) – “yes, very carefully” (code 6);
- 138 – frequency of sun exposure on a seven-point scale anchored with “almost never” (code 1) –  
139 “over three hours a day” (code 7); no responder chose code 7;
- 140 – frequency of visits to tanning salons on a five-point scale anchored with “never” (code 1) –  
141 “yes, almost throughout the year” (code 5);
- 142 – frequency of taking vitamin D supplements on a six-point scale anchored with “never”  
143 (code 2) – “yes, almost constantly” (code 6). Here, responders could also check “I do not  
144 know” (code 1: “missing value”).

145 Participants were also asked whether they had red hair on other parts of their body (e.g. facial  
146 hair, body hair) and whether they had redhaired relatives (binary variables). The other two  
147 binary variables of red hair (no/yes) and red hair in childhood (no/yes) were obtained by  
148 splitting the corresponding ordinal variables (0: 1, 2 vs. 1: 3, 4, 5, 6). We also monitored

149 potential confounding variables such as sex, age, and size of place of residence (six  
150 categories: <1000 inhabitants, 1,000–5,000, 5,000–50,000, 50,000–100,000, 100,000–  
151 500,000, Prague or Bratislava).

### 152 *Measuring skin and hair pigmentation with a spectrophotometer*

153 Measurements of the natural red color of participant's hair and darkness or lightness of their  
154 skin tone was performed with a spectrophotometer (Ocean Optics FLAME-S). The device  
155 was white-calibrated using a WS-1 Diffuser Reflectance Standard. Before commencing the  
156 measurement, the experimenter asked if participant's hair had been dyed and then cleaned the  
157 participant's cheeks and forehead with a make-up removal pad. Then he took three  
158 spectrophotometric measurements of skin color on the inner upper arm of the less dominant  
159 hand (depending on participants' self-reported handedness), one on the left cheek, one on the  
160 right cheek, and one on the forehead above nasal root. To measure hair color, the  
161 experimenter moved aside the crown hair to get to the hair in the occipital region and made  
162 sure that the scalp was not visible. Then he took three spectrophotometric measurements of  
163 hair color in different areas around the occipital region. The occipital region and inner upper  
164 arm are the areas least exposed to sunlight, which is why hair and skin color found there  
165 correspond most closely to the natural color. We used two methods to determine the total  
166 level of redheadedness. The first was Reed's function (Reed, 1952):

$$167 \quad R = \frac{100 (y_{530} - 0.243y_{400})}{y_{650}},$$

168 where  $y_{400}$ ,  $y_{530}$ , and  $y_{650}$  are the arithmetical means of three measurements of percentage  
169 reflectance values at wavelengths in the subscript. The second was the CIE L\*a\*b\* color  
170 space: it provided the a\* parameter which ranges from -100 (green) to +100 (red) (Lozano,  
171 Saunier, Panhard, & Loussouarn, 2017; Vaughn, van Oorschot, & Baidur-Hudson, 2008).

### 172 *Measurements of calcidiol and folic acid concentrations*

173 Calcidiol concentration was measured using High Performance Liquid Chromatography by  
174 ClinRep® Complete Kit for 25-OH-Vitamin D2/D3 (RECIPE Chemicals + Instruments  
175 GmbH, Munich, Germany). Folic acid was measured with ID-Vit®Folic acid microtiter plate  
176 kit (Immundiagnostik AG, Bensheim, Germany). After incubation at 37°C for 48 hours, the  
177 growth of *Lactobacillus rhamnosus* was measured turbidimetrically at 620 nm using  
178 ELISA-reader Spark™ 10M (Tecan, Männedorf, Switzerland).

179

180

181 *Statistics*

182 Statistica v. 10.0 was used to explore the data and R v. 3.3.1 (R Core Team, 2018) for  
183 confirmatory statistical tests. Associations of sex with age, and calcidiol and folic acid  
184 concentrations were estimated by a t-test and correlation of sex, age, and urbanization with all  
185 focal variables by a Kendall correlation test. Partial Kendall correlation test (R package ppcor  
186 1.1 (Kim, 2015)) with age, urbanization, and in some analyses also sex as potential covariates  
187 was used for the main analysis. This multivariate nonparametric test allows for measuring the  
188 significance and strength of correlations between any combination of binary, ordinal, and  
189 continuous variables while controlling for any number of confounding variables. In the  
190 confirmatory part of the study, i.e. to test the hypothesized effect of redheadedness on  
191 calcidiol and folic acid concentrations, we performed a correction for multiple tests by  
192 Benjamini-Hochberg procedure with false discovery rate preset to 0.20 (Benjamini &  
193 Hochberg, 1995). In the exploratory parts of the study, we performed no correction for  
194 multiple tests.

195

196 **Results**

197 The final population consisted of 110 women (mean age 27.4, SD 7.5) and 93 men (mean age  
198 34.0, SD 9.0). The age difference between men and women was highly significant ( $t_{180} =$   
199 3.92,  $p = 0.0001$ , Cohen's  $d = 0.563$ ). Table 1 shows the descriptive statistics for our ordinal  
200 and binary data. Kendall correlation test showed that men and women, the old and the young,  
201 people residing in small and large settlements, and redhaired versus non-redhaired people  
202 differed in their responses to hair and body pigmentation-related variables as well as in  
203 behavioral variables related to sun exposure (Table 1, the last four columns). Average  
204 calcidiol concentrations were higher in 105 women (75.1 nmol/L, SD 22.8) than in 88 men  
205 (70.2 nmol/L, SD 21.8) but the difference was not statistically significant ( $t_{186} = 1.54$ ,  $p =$   
206 0.124, Cohen's  $d = -0.224$ ). Folic acid concentrations were also non-significantly higher in 99  
207 women (7.48  $\mu\text{g/L}$ , SD 5.71) than in 78 men (7.11  $\mu\text{g/L}$ , SD 4.78) ( $t_{174} = 1.54$ ,  $p = 0.643$ ,  
208 Cohen's  $d = -0.069$ ). Table 2 shows correlations between calcidiol and folic acid  
209 concentrations and age and urbanization. Except for a strong positive correlation between  
210 folic acid concentration and age (Tau = 0.210,  $p < 0.00001$ ), none of these correlations  
211 reached the formal level of statistical significance.

212 **Table 1** Distributions of responses of participants (or observers) to particular questions.

|                          |       | bioRxiv preprint doi: <a href="https://doi.org/10.1101/2019.12.30.890889">https://doi.org/10.1101/2019.12.30.890889</a> ; this version posted December 30, 2019. The copyright holder for this preprint (which was not certified by peer review) is the author/funder, who has granted bioRxiv a license to display the preprint in perpetuity. It is made available under aCC-BY-ND 4.0 International license. |        |    |       |    |       |    |       |    |       |    |       |     |             |             |             |             |  |
|--------------------------|-------|-----------------------------------------------------------------------------------------------------------------------------------------------------------------------------------------------------------------------------------------------------------------------------------------------------------------------------------------------------------------------------------------------------------------|--------|----|-------|----|-------|----|-------|----|-------|----|-------|-----|-------------|-------------|-------------|-------------|--|
| Urbanization             | women | 11                                                                                                                                                                                                                                                                                                                                                                                                              | 10.00  | 14 | 12.73 | 9  | 8.18  | 2  | 1.82  | 1  | 0.91  | 73 | 66.36 | Tau | 0.072       | 0.082       | NA          | 0.085       |  |
|                          | men   | 3                                                                                                                                                                                                                                                                                                                                                                                                               | 3.23   | 10 | 10.75 | 10 | 10.75 | 1  | 1.08  | 3  | 3.23  | 66 | 70.97 | P   | 0.13        | 0.08        | NA          | 0.07        |  |
| Hair redness             | women | 50                                                                                                                                                                                                                                                                                                                                                                                                              | 45.45  | 16 | 14.55 | 7  | 6.36  | 17 | 15.45 | 13 | 11.82 | 7  | 6.36  | Tau | -0.088      | -0.082      | 0.085       | NA          |  |
|                          | men   | 49                                                                                                                                                                                                                                                                                                                                                                                                              | 52.69  | 15 | 16.13 | 9  | 9.68  | 8  | 8.60  | 7  | 7.53  | 5  | 5.38  | P   | 0.06        | 0.08        | 0.07        | NA          |  |
| Redness childhood        | women | 53                                                                                                                                                                                                                                                                                                                                                                                                              | 49.07  | 9  | 8.33  | 4  | 3.70  | 7  | 6.48  | 10 | 9.26  | 25 | 23.15 | Tau | -0.117      | -0.084      | 0.095       | 0.801       |  |
|                          | men   | 56                                                                                                                                                                                                                                                                                                                                                                                                              | 60.22  | 4  | 4.30  | 7  | 7.53  | 6  | 6.45  | 8  | 8.60  | 12 | 12.90 | P   | <b>0.01</b> | 0.08        | <b>0.05</b> | <b>0.00</b> |  |
| Body hair redness        | women | 70                                                                                                                                                                                                                                                                                                                                                                                                              | 63.64  | 40 | 36.36 |    |       |    |       |    |       |    |       | Tau | 0.089       | 0.053       | 0.100       | 0.680       |  |
|                          | men   | 51                                                                                                                                                                                                                                                                                                                                                                                                              | 54.84  | 42 | 45.16 |    |       |    |       |    |       |    |       | P   | 0.06        | 0.26        | <b>0.03</b> | <b>0.00</b> |  |
| Red hair relatives       | women | 71                                                                                                                                                                                                                                                                                                                                                                                                              | 65.74  | 37 | 34.26 |    |       |    |       |    |       |    |       | Tau | 0.013       | -0.016      | 0.062       | 0.523       |  |
|                          | men   | 60                                                                                                                                                                                                                                                                                                                                                                                                              | 64.52  | 33 | 35.48 |    |       |    |       |    |       |    |       | P   | 0.79        | 0.73        | 0.19        | <b>0.00</b> |  |
| Hair redness observer 1  | women | 52                                                                                                                                                                                                                                                                                                                                                                                                              | 47.27  | 16 | 14.55 | 2  | 1.82  | 3  | 2.73  | 15 | 13.64 | 22 | 20.00 | Tau | -0.151      | -0.127      | 0.047       | 0.745       |  |
|                          | men   | 59                                                                                                                                                                                                                                                                                                                                                                                                              | 63.44  | 11 | 11.83 | 5  | 5.38  | 1  | 1.08  | 3  | 3.23  | 14 | 15.05 | P   | <b>0.00</b> | <b>0.01</b> | 0.32        | <b>0.00</b> |  |
| Hair redness observer 2  | women | 5                                                                                                                                                                                                                                                                                                                                                                                                               | 4.55   | 12 | 10.91 | 18 | 16.36 | 33 | 30.00 | 24 | 21.82 | 18 | 16.36 | Tau | -0.103      | -0.087      | 0.010       | 0.574       |  |
|                          | men   | 11                                                                                                                                                                                                                                                                                                                                                                                                              | 11.83  | 15 | 16.13 | 14 | 15.05 | 22 | 23.66 | 18 | 19.35 | 13 | 13.98 | P   | <b>0.03</b> | 0.07        | 0.83        | <b>0.00</b> |  |
| Hair darkness            | women | 1                                                                                                                                                                                                                                                                                                                                                                                                               | 0.91   | 17 | 15.45 | 33 | 30.00 | 33 | 30.00 | 24 | 21.82 | 2  | 1.82  | Tau | 0.108       | 0.073       | -0.021      | -0.277      |  |
|                          | men   | 0                                                                                                                                                                                                                                                                                                                                                                                                               | 0.00   | 9  | 9.68  | 26 | 27.96 | 28 | 30.11 | 27 | 29.03 | 3  | 3.23  | P   | <b>0.02</b> | 0.12        | 0.66        | <b>0.00</b> |  |
| Baldness                 | women |                                                                                                                                                                                                                                                                                                                                                                                                                 |        |    |       |    |       |    |       |    |       |    |       | Tau | NA          | 0.229       | 0.146       | -0.104      |  |
|                          | men   | 41                                                                                                                                                                                                                                                                                                                                                                                                              | 44.09  | 40 | 43.01 | 6  | 6.45  | 2  | 2.15  | 0  | 0.00  | 0  | 0.00  | P   | NA          | <b>0.00</b> | <b>0.04</b> | 0.15        |  |
| Hair length              | women | 0                                                                                                                                                                                                                                                                                                                                                                                                               | 0.00   | 6  | 5.45  | 56 | 50.91 | 48 | 43.64 |    |       |    |       | Tau | -0.666      | -0.105      | -0.006      | 0.155       |  |
|                          | men   | 39                                                                                                                                                                                                                                                                                                                                                                                                              | 42.39  | 38 | 41.30 | 9  | 9.78  | 6  | 6.52  |    |       |    |       | P   | <b>0.00</b> | <b>0.03</b> | 0.89        | <b>0.00</b> |  |
| Natural skin darkness    | women | 22                                                                                                                                                                                                                                                                                                                                                                                                              | 20.00  | 49 | 44.55 | 26 | 23.64 | 12 | 10.91 | 1  | 0.91  | 0  | 0.00  | Tau | 0.161       | 0.123       | -0.098      | -0.406      |  |
|                          | men   | 13                                                                                                                                                                                                                                                                                                                                                                                                              | 13.98  | 31 | 33.33 | 29 | 31.18 | 16 | 17.20 | 3  | 3.23  | 1  | 1.08  | P   | <b>0.00</b> | <b>0.01</b> | <b>0.04</b> | <b>0.00</b> |  |
| Suntan                   | women | 11                                                                                                                                                                                                                                                                                                                                                                                                              | 10.00  | 35 | 31.82 | 30 | 27.27 | 25 | 22.73 | 8  | 7.27  | 1  | 0.91  | Tau | 0.057       | 0.059       | -0.113      | -0.157      |  |
|                          | men   | 8                                                                                                                                                                                                                                                                                                                                                                                                               | 8.60   | 31 | 33.33 | 16 | 17.20 | 26 | 27.96 | 10 | 10.75 | 2  | 2.15  | P   | 0.23        | 0.21        | <b>0.02</b> | <b>0.04</b> |  |
| Brown tanning            | women | 21                                                                                                                                                                                                                                                                                                                                                                                                              | 19.09  | 25 | 22.73 | 18 | 16.36 | 18 | 16.36 | 21 | 19.09 | 7  | 6.36  | Tau | 0.083       | 0.077       | -0.036      | -0.407      |  |
|                          | men   | 12                                                                                                                                                                                                                                                                                                                                                                                                              | 12.90  | 20 | 21.51 | 16 | 17.20 | 15 | 16.13 | 22 | 23.66 | 8  | 8.60  | P   | 0.08        | 0.10        | 0.44        | <b>0.00</b> |  |
| Red tanning              | women | 18                                                                                                                                                                                                                                                                                                                                                                                                              | 16.36  | 24 | 21.82 | 15 | 13.64 | 13 | 11.82 | 22 | 20.00 | 18 | 16.36 | Tau | 0.001       | -0.016      | 0.150       | 0.432       |  |
|                          | men   | 10                                                                                                                                                                                                                                                                                                                                                                                                              | 10.75  | 22 | 23.66 | 18 | 19.35 | 14 | 15.05 | 17 | 18.28 | 12 | 12.90 | P   | 0.99        | 0.73        | <b>0.00</b> | <b>0.00</b> |  |
| Freckledness observer 1  | women | 54                                                                                                                                                                                                                                                                                                                                                                                                              | 49.09  | 17 | 15.45 | 17 | 15.45 | 7  | 6.36  | 4  | 3.64  | 11 | 10.00 | Tau | -0.196      | -0.045      | 0.053       | 0.518       |  |
|                          | men   | 61                                                                                                                                                                                                                                                                                                                                                                                                              | 65.59  | 19 | 20.43 | 5  | 5.38  | 6  | 6.45  | 0  | 0.00  | 2  | 2.15  | P   | <b>0.00</b> | 0.34        | 0.26        | <b>0.00</b> |  |
| Freckledness observer 2  | women | 5                                                                                                                                                                                                                                                                                                                                                                                                               | 4.55   | 12 | 10.91 | 18 | 16.36 | 33 | 30.00 | 24 | 21.82 | 18 | 16.36 | Tau | -0.150      | -0.023      | 0.082       | 0.542       |  |
|                          | men   | 11                                                                                                                                                                                                                                                                                                                                                                                                              | 11.83  | 15 | 16.13 | 14 | 15.05 | 22 | 23.66 | 18 | 19.35 | 13 | 13.98 | P   | <b>0.00</b> | 0.63        | 0.08        | <b>0.00</b> |  |
| Protection by sun creams | women | 9                                                                                                                                                                                                                                                                                                                                                                                                               | 8.18   | 13 | 11.82 | 11 | 10.00 | 28 | 25.45 | 26 | 23.64 | 23 | 20.91 | Tau | -0.163      | -0.122      | 0.171       | 0.250       |  |
|                          | men   | 15                                                                                                                                                                                                                                                                                                                                                                                                              | 16.13  | 15 | 16.13 | 14 | 15.05 | 20 | 21.51 | 18 | 19.35 | 11 | 11.83 | P   | <b>0.00</b> | <b>0.01</b> | <b>0.00</b> | <b>0.00</b> |  |
| Protection by shelters   | women | 21                                                                                                                                                                                                                                                                                                                                                                                                              | 19.09  | 24 | 21.82 | 20 | 18.18 | 22 | 20.00 | 15 | 13.64 | 8  | 7.27  | Tau | -0.099      | -0.006      | 0.015       | 0.177       |  |
|                          | men   | 20                                                                                                                                                                                                                                                                                                                                                                                                              | 21.51  | 26 | 27.96 | 17 | 18.28 | 20 | 21.51 | 10 | 10.75 | 0  | 0.00  | P   | <b>0.04</b> | 0.91        | 0.76        | <b>0.00</b> |  |
| Sun exposure             | women | 3                                                                                                                                                                                                                                                                                                                                                                                                               | 2.73   | 1  | 0.91  | 13 | 11.82 | 17 | 15.45 | 27 | 24.55 | 49 | 44.55 | Tau | -0.020      | -0.019      | -0.061      | 0.001       |  |
|                          | men   | 0                                                                                                                                                                                                                                                                                                                                                                                                               | 0.00   | 1  | 1.08  | 6  | 6.45  | 17 | 18.28 | 37 | 39.78 | 32 | 34.41 | P   | 0.67        | 0.69        | 0.20        | 0.99        |  |
| Tanning salons           | women | 103                                                                                                                                                                                                                                                                                                                                                                                                             | 93.64  | 4  | 3.64  | 2  | 1.82  | 1  | 0.91  | 0  | 0.00  |    |       | Tau | -0.173      | -0.001      | 0.072       | -0.010      |  |
|                          | men   | 93                                                                                                                                                                                                                                                                                                                                                                                                              | 100.00 | 0  | 0.00  | 0  | 0.00  | 0  | 0.00  | 0  | 0.00  |    |       | P   | <b>0.00</b> | 0.98        | 0.13        | 0.84        |  |
| Vitamin D supplements    | women | 21                                                                                                                                                                                                                                                                                                                                                                                                              | 19.27  | 56 | 51.38 | 24 | 22.02 | 0  | 0.00  | 7  | 6.42  | 1  | 0.92  | Tau | -0.096      | 0.130       | 0.015       | -0.088      |  |
|                          | men   | 27                                                                                                                                                                                                                                                                                                                                                                                                              | 29.03  | 44 | 47.31 | 16 | 17.20 | 0  | 0.00  | 2  | 2.15  | 4  | 4.30  | P   | <b>0.04</b> | <b>0.01</b> | 0.75        | 0.06        |  |

213 This table shows the distribution of responses of our subjects (and observers) to particular questions.  
214 The last four columns show the strength and significance (Tau and p) of Kendall correlations between  
215 variables listed in the first column and sex, age, urbanization, and intensity of hair redness  
216 (controlled for age and urbanization), respectively. Positive Tau means that men, older subjects,  
217 residents of larger cities, and more redhaired subjects provided higher codes of responses than  
218 women, younger subjects, residents of smaller cities, and less redhaired subjects (see Material and



219 *methods). Significant correlations are printed in bold. Statistical significance below 0.005 is coded*  
220 *0.00.*

221

222 The effect of hair redness and other variables related to hair and body pigmentation as well as  
223 sun exposure behaviors on the concentration of calcidiol and folic acid in the serum was  
224 analyzed primarily with nonparametric partial Kendall correlations controlled for age and  
225 urbanization. Nevertheless, similar results were obtained also when sex, hair and skin tone  
226 (light to dark), and even the frequency of sun exposure and intensity of suntan were  
227 controlled for. Our results suggest that hair redness has the strongest effect on calcidiol  
228 concentrations (significant after correction for multiple tests) and a negligible effect on folic  
229 acid concentrations (see Figures 1–2, Table 2). The strongest correlation was observed when  
230 analyses used the binary variable hair redness obtained from hair redness estimated by the  
231 subjects on an ordinal scale of 1–6 split to 0 (responses 1 and 2) and 1 (responses 3–6).  
232 Nonetheless, effects of a similar strength were detected when the intensity of hair redness  
233 was measured spectrophotometrically and that held regardless of which index, including raw  
234 reflectance at 650 nm, of hair redness was applied.

235 **Fig. 1** The effect of sex and red hair color on calcidiol concentration.

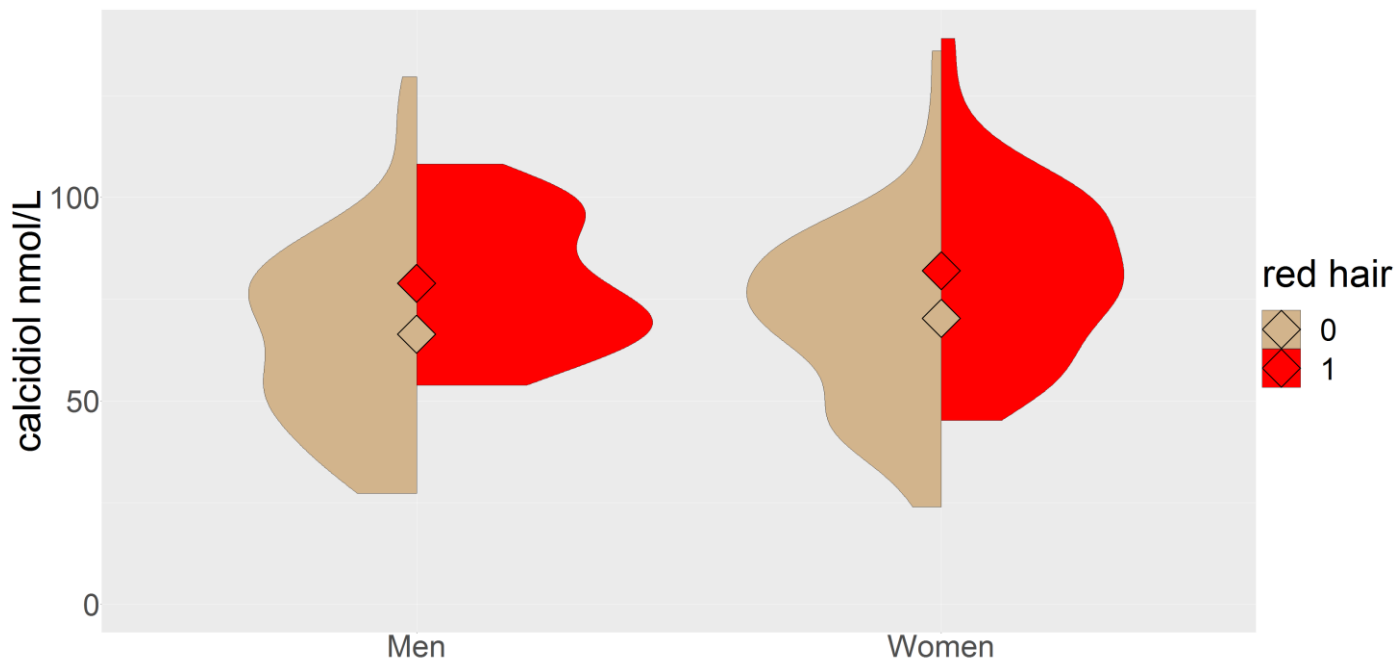

236

237 *The split violin plot shows the means and distribution computed as kernel probability density.*

238

239

240 **Fig. 2** The effect of sex and red hair color on folic acid concentrations.

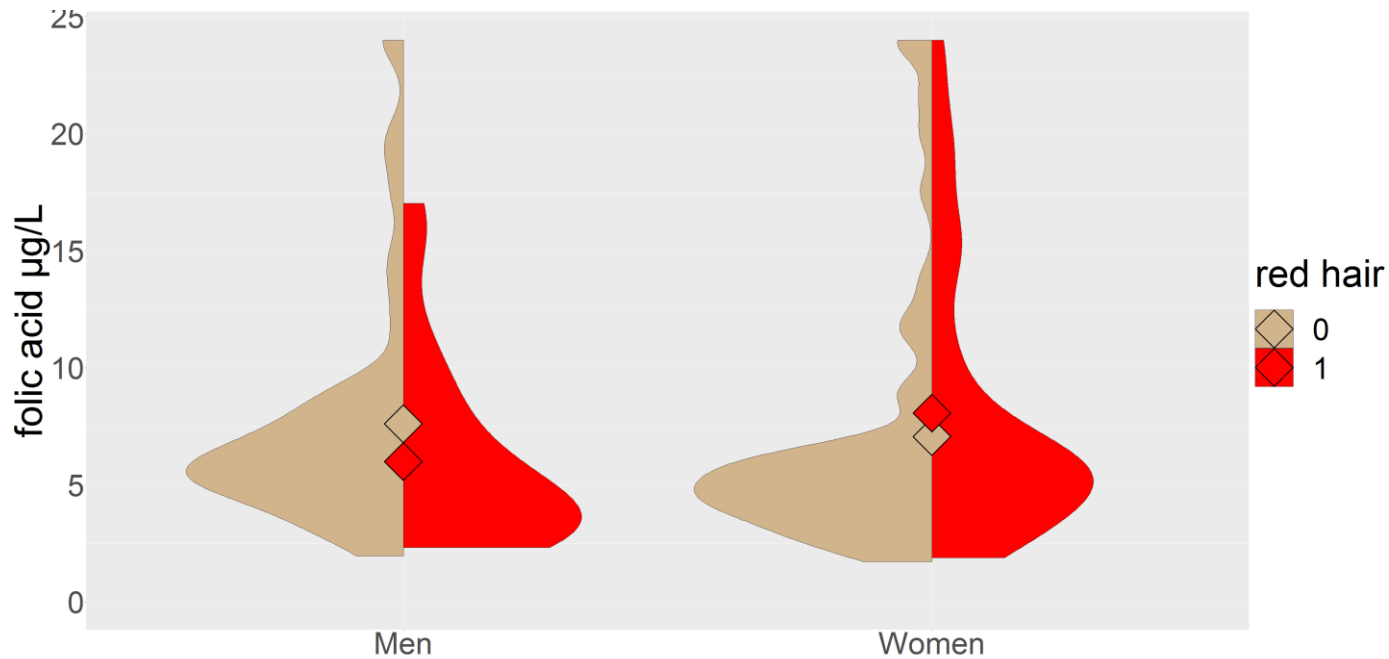

241

242 *The split violin plot shows the means and distribution computed as kernel probability density.*

243

244 **Table 2** The effects of variables related to body pigmentation and sun exposure behaviors on  
245 calcidiol and folic acid concentrations.

|                          | ALL       |              |            |              | MEN       |              |            |              | WOMEN     |              |            |              |
|--------------------------|-----------|--------------|------------|--------------|-----------|--------------|------------|--------------|-----------|--------------|------------|--------------|
|                          | calcidiol |              | folic acid |              | calcidiol |              | folic acid |              | calcidiol |              | folic acid |              |
|                          | Tau       | p            | Tau        | p            | Tau       | p            | Tau        | p            | Tau       | p            | Tau        | p            |
| Age                      | -0.061    | 0.210        | 0.210      | <b>0.000</b> | -0.070    | 0.339        | 0.113      | 0.148        | -0.015    | 0.820        | 0.285      | <b>0.000</b> |
| Urbanization             | -0.062    | 0.201        | 0.018      | 0.722        | 0.024     | 0.739        | 0.028      | 0.723        | -0.120    | 0.072        | 0.016      | 0.819        |
| Hair redness             | 0.142     | <b>0.004</b> | 0.002      | 0.968        | 0.138     | 0.060        | -0.134     | 0.086        | 0.149     | <b>0.027</b> | 0.089      | 0.195        |
| Hair redness binary      | 0.229     | <b>0.000</b> | -0.017     | 0.737        | 0.222     | <b>0.002</b> | -0.172     | <b>0.028</b> | 0.239     | <b>0.000</b> | 0.077      | 0.265        |
| Redness childhood        | 0.141     | <b>0.004</b> | 0.004      | 0.931        | 0.198     | <b>0.007</b> | -0.126     | 0.107        | 0.110     | 0.105        | 0.074      | 0.286        |
| Redness childhood binary | 0.173     | <b>0.000</b> | -0.010     | 0.851        | 0.252     | <b>0.001</b> | -0.167     | <b>0.033</b> | 0.124     | 0.064        | 0.099      | 0.151        |
| Body hair redness        | 0.203     | <b>0.000</b> | -0.018     | 0.722        | 0.186     | <b>0.011</b> | -0.101     | 0.196        | 0.236     | <b>0.000</b> | 0.043      | 0.537        |
| Red hair relatives       | 0.072     | 0.145        | -0.091     | 0.075        | 0.116     | 0.114        | -0.227     | <b>0.004</b> | 0.036     | 0.595        | 0.011      | 0.875        |
| Hair redness observer 1  | 0.192     | <b>0.000</b> | 0.007      | 0.884        | 0.165     | <b>0.025</b> | -0.112     | 0.154        | 0.206     | <b>0.002</b> | 0.062      | 0.369        |
| Hair redness observer 2  | 0.167     | <b>0.001</b> | -0.015     | 0.763        | 0.185     | <b>0.012</b> | -0.097     | 0.214        | 0.160     | <b>0.017</b> | 0.047      | 0.492        |
| Reflectance 400          | 0.128     | <b>0.009</b> | -0.011     | 0.833        | 0.159     | <b>0.030</b> | -0.118     | 0.131        | 0.114     | 0.090        | 0.084      | 0.225        |
| Reflectance 530          | 0.177     | <b>0.000</b> | 0.016      | 0.750        | 0.226     | <b>0.002</b> | -0.085     | 0.275        | 0.146     | <b>0.029</b> | 0.110      | 0.112        |
| Reflectance 650          | 0.204     | <b>0.000</b> | 0.015      | 0.768        | 0.231     | <b>0.002</b> | -0.062     | 0.429        | 0.179     | <b>0.008</b> | 0.082      | 0.235        |
| Hair redness R           | -0.202    | <b>0.000</b> | -0.004     | 0.937        | -0.189    | <b>0.010</b> | -0.002     | 0.978        | -0.185    | <b>0.006</b> | 0.014      | 0.839        |
| Hair redness a*          | 0.205     | <b>0.000</b> | 0.012      | 0.807        | 0.200     | <b>0.006</b> | -0.039     | 0.614        | 0.189     | <b>0.005</b> | 0.041      | 0.552        |

|                          |        |              |        |              |        |              |        |              |        |              |        |              |
|--------------------------|--------|--------------|--------|--------------|--------|--------------|--------|--------------|--------|--------------|--------|--------------|
| Hair darkness            | -0.117 | <b>0.016</b> | -0.006 | 0.899        | -0.132 | 0.071        | 0.110  | 0.159        | -0.097 | 0.147        | -0.091 | 0.185        |
| Hair length              | 0.045  | 0.357        | 0.039  | 0.441        | -0.074 | 0.317        | -0.108 | 0.171        | 0.072  | 0.283        | 0.149  | <b>0.031</b> |
| Baldness                 | 0.048  | 0.511        | 0.208  | <b>0.008</b> | 0.048  | 0.511        | 0.208  | <b>0.008</b> | NA     | NA           | NA     | NA           |
| Natural skin darkness    | -0.036 | 0.464        | 0.072  | 0.159        | 0.031  | 0.674        | 0.152  | 0.052        | -0.102 | 0.127        | 0.010  | 0.880        |
| Suntan                   | 0.151  | <b>0.002</b> | 0.067  | 0.189        | 0.191  | <b>0.009</b> | 0.079  | 0.311        | 0.111  | 0.099        | 0.074  | 0.286        |
| Brown tanning            | -0.035 | 0.474        | 0.005  | 0.925        | -0.031 | 0.672        | 0.102  | 0.193        | -0.051 | 0.445        | -0.047 | 0.499        |
| Red tanning              | 0.049  | 0.317        | 0.007  | 0.898        | 0.101  | 0.167        | -0.076 | 0.334        | 0.024  | 0.726        | 0.049  | 0.477        |
| Freckledness observer 1  | 0.120  | <b>0.014</b> | -0.024 | 0.631        | 0.062  | 0.395        | -0.154 | <b>0.049</b> | 0.142  | <b>0.034</b> | 0.033  | 0.628        |
| Freckledness observer 2  | 0.121  | <b>0.013</b> | -0.031 | 0.541        | 0.121  | 0.099        | -0.125 | 0.110        | 0.121  | 0.072        | 0.018  | 0.789        |
| Facial skin fairness     | -0.066 | 0.173        | -0.016 | 0.746        | -0.202 | <b>0.006</b> | -0.136 | 0.082        | -0.087 | 0.194        | 0.031  | 0.658        |
| Arm skin fairness        | -0.079 | 0.106        | 0.038  | 0.460        | -0.124 | 0.091        | -0.031 | 0.687        | -0.066 | 0.323        | 0.055  | 0.423        |
| Protection by sun creams | 0.043  | 0.373        | -0.032 | 0.534        | 0.087  | 0.238        | -0.144 | 0.066        | -0.009 | 0.898        | 0.023  | 0.734        |
| Protection by shelters   | -0.079 | 0.107        | -0.039 | 0.439        | -0.084 | 0.253        | -0.107 | 0.173        | -0.086 | 0.200        | -0.006 | 0.936        |
| Sunbathing               | 0.114  | <b>0.020</b> | 0.033  | 0.521        | 0.208  | <b>0.005</b> | 0.048  | 0.543        | 0.052  | 0.435        | 0.030  | 0.666        |
| Tanning salons           | -0.016 | 0.743        | -0.140 | <b>0.006</b> | NA     | NA           | NA     | NA           | -0.043 | 0.526        | -0.209 | <b>0.002</b> |
| Vitamin D supplements    | 0.003  | 0.956        | 0.026  | 0.659        | 0.010  | 0.913        | 0.065  | 0.493        | -0.007 | 0.928        | -0.010 | 0.894        |

246 *This table shows the strength and direction of partial Kendall correlations (controlled for age and urbanization)*  
 247 *between variables listed in the first column (see Material and methods) and calcidiol and folic acid*  
 248 *concentrations. Significant correlations are printed in bold.*

249

250 Separate partial Kendall analyses for redhaired and non-redhaired subjects showed that sun  
 251 exposure had a minimal effect on calcidiol and folic acid concentrations in redhaired subjects  
 252 (except for a negative effect of frequency of tanning salon visits on calcidiol levels). In non-  
 253 redhaired subjects, sun exposure did have the expected effect on calcidiol and folic acid  
 254 levels (see Figures 3–4, Table 3).

255

256

257

258

259

260

261

262

263

264 **Fig. 3** The effect of sun exposure on calcidiol concentrations.

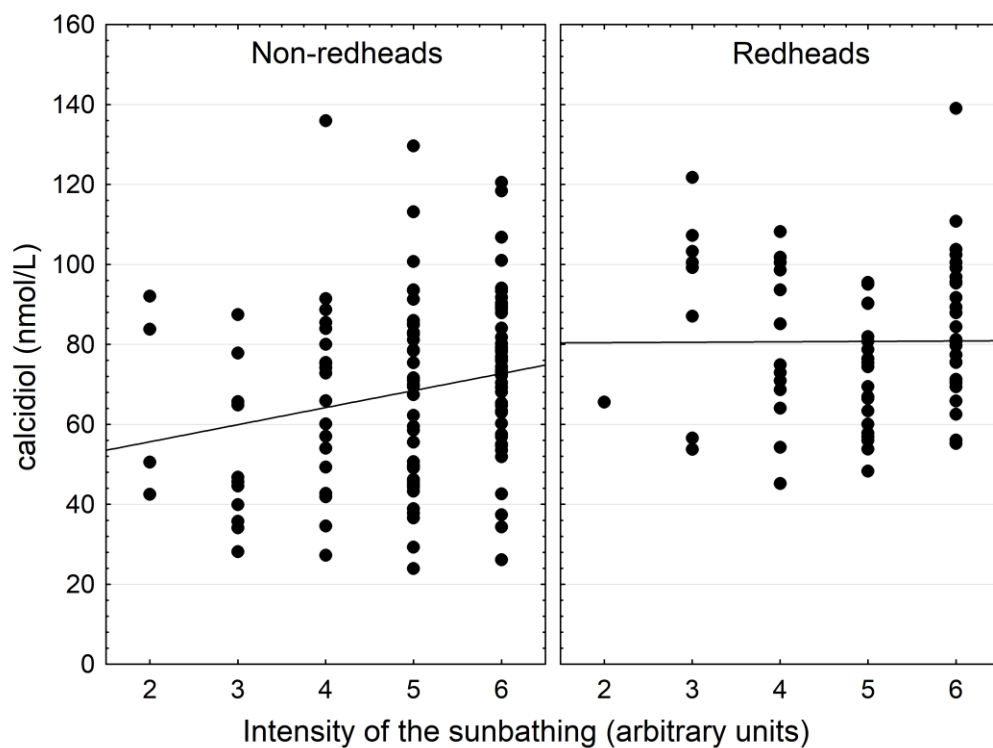

265

266

267 **Fig. 4** The effect of protection from sun exposure by seeking shelter on calcidiol

268 concentrations.

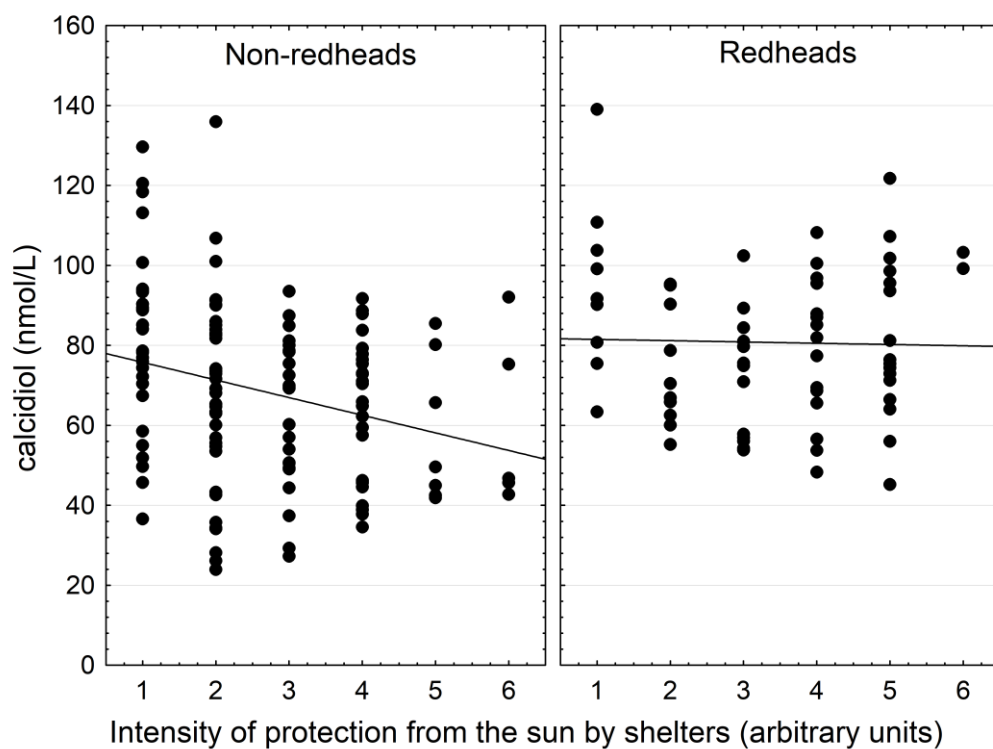

269

270

271 **Table 3** The effect of sun exposure-related variables on calcidiol and folic acid  
 272 concentrations and suntan intensity.

|                          | Redhaired subjects |            |               | Non-redhaired subjects |               |               |
|--------------------------|--------------------|------------|---------------|------------------------|---------------|---------------|
|                          | calcidiol          | folic acid | suntan        | calcidiol              | folic acid    | suntan        |
| Natural skin darkness    | 0.015              | 0.097      | <b>0.475</b>  | 0.091                  | 0.050         | <b>0.431</b>  |
| Suntan                   | 0.079              | -0.010     | NA            | <b>0.241</b>           | 0.098         | NA            |
| Protection by sun creams | -0.073             | -0.061     | <b>-0.295</b> | 0.012                  | -0.022        | <b>-0.145</b> |
| Protection by shelters   | 0.050              | 0.068      | -0.156        | <b>-0.202</b>          | -0.091        | <b>-0.296</b> |
| Sun exposure             | 0.014              | 0.082      | <b>0.337</b>  | <b>0.168</b>           | -0.009        | <b>0.404</b>  |
| Tanning salons           | <b>-0.211</b>      | -0.120     | 0.113         | 0.099                  | <b>-0.161</b> | -0.079        |

273 *The table shows the strength and direction (Taus) of partial Kendall correlations (controlled for age*  
 274 *and urbanization) between variables listed in the first column (see Material and methods) and*  
 275 *calcidiol and folic acid concentrations as well as suntan. Significant correlations are in bold.*

276

## 277 Discussion

278 Redhaired subjects had higher calcidiol concentrations and approximately the same folic acid  
 279 concentrations as non-redhaired subjects. Results of partial correlations suggest that redhaired  
 280 subjects need less sun exposure to achieve satisfactory calcidiol levels – and thereby probably  
 281 also satisfactory levels of a biologically active vitamin D – than non-redhaired subjects do.

282 Differences between redhaired and non-redhaired subjects are likely to be due to differences  
 283 in their physiology than an effect of their sunbathing-related behavior. For example, we  
 284 observed no differences in the intensity of sun exposure between redhaired and non-redhaired  
 285 subjects but redhaired subjects were less tanned at the time of the study. Redhaired subjects  
 286 also reported that they use more intensive chemical and mechanical sun protection than their  
 287 non-redhaired peers. In contrast to the situation in non-redhaired persons, redhaired persons’  
 288 calcidiol concentrations seemed independent of the intensity of sun exposure or protection  
 289 from solar radiation. Redhaired subjects used vitamin D supplements less frequently but it  
 290 should be noted that while the effect of these supplements on calcidiol levels was positive, it  
 291 was at best modest and always non-significant. This absence of effect of vitamin D  
 292 supplement use could be due to the fact that they tend to be used by persons with a diagnosed  
 293 vitamin D deficiency.

294 Darker hues of natural hair but not of natural skin, both self-rated and measured  
295 spectrophotometrically, had a relatively strong negative effect on calcidiol concentrations.  
296 The two questions concerning natural skin hue and current tan were placed alongside each  
297 other in the questionnaire: it is therefore likely that responders rated the intensity of natural  
298 skin fairness or darkness as it looks untanned. The question on the darkness of natural hair,  
299 on the other hand, was in a different part of the questionnaire. It can be speculated that hair  
300 darkness actually reflects both the amount of eumelanin (positively) and intensity of sun  
301 exposure in the past (negatively). Calcidiol levels, meanwhile, could be negatively affected  
302 both by high eumelanin levels and by absence of sun exposure. With respect to skin (but not  
303 hair), sun exposure promotes darker hues. The opposite effect of eumelanin levels, which are  
304 positively correlated with darker natural skin hues and suntan intensity (acquired skin  
305 darkness), on calcidiol concentrations cancel each other. The result is an absence of  
306 correlation between darker skin hues and calcidiol levels.

307 It is known that solar radiation destroys folic acid by photolysis (Branda & Eaton, 1978;  
308 Jablonski & Chaplin, 2000). One could thus expect that folic acid concentrations would  
309 negatively correlate with the intensity of sun exposure and intensity of suntan. Actual data,  
310 however, show only weak positive correlations, none of which reach the formal level of  
311 significance. The only significant (and relatively strong) negative correlation with folic acid  
312 concentrations was found with respect to the frequency of visiting tanning salons. This  
313 pattern is in agreement with current theories (Jones, Lucock, Veysey, & Beckett, 2018)  
314 according to which in human populations there exist two mutually independent skin darkness  
315 latitudinal gradients, the results of two distinct selection pressures. The first gradient is found  
316 in populations which originated between subtropical and subpolar latitudes, that is, in the  
317 temperate climate. This gradient is the result of insufficient photosynthesis of vitamin D  
318 precursor in areas with low solar UV radiation. The second gradient is found in populations  
319 which originated between the tropics and the subtropics and its development was driven by  
320 excessive photolysis of folic acid in areas with intense solar radiation. The Czech Republic  
321 lies for the most part between 48° and 51° of northern latitude, where insufficient UV  
322 radiation rather than excess radiation could pose a problem, especially during the winter and  
323 spring months. It is indicative and perhaps clinically relevant that in our study, folic acid  
324 concentrations negatively correlated with the frequency of tanning salon visits.

325 We also found a rather strong positive correlation between the intensity of baldness and folic  
326 acid concentrations in men. Baldness intensity was not self-rated by women because our

327 previous studies showed a minimal variability in this variable in young women. In men,  
328 however, both folic acid concentrations and baldness intensity strongly correlated with age.  
329 The strength of the correlation between folic acid concentration and baldness, however, was  
330 similar in cases where the age was (Tau = 0.21) and was not (Tau = 0.22) controlled for. In  
331 contrast to a general expectation, published data show no empirical evidence for an  
332 involvement of folic acid deficiency in alopecia (Almohanna, Ahmed, Tsatalis, & Tosti,  
333 2019; Guo & Katta, 2017). Some studies even seem to support the notion of a positive  
334 association between folic acid and alopecia. For example, Rushton (2002) shows that among  
335 200 healthy women complaining of increased hair shedding for over six months, only 1 had a  
336 “bellow range” folic acid level, while 57 had “above range” folic acid levels. Another study  
337 reported no significant difference in folate concentrations in a population of 91 female  
338 patients diagnosed with diffuse hair loss and 74 controls (Durusoy et al., 2009). Authors of  
339 that study did not, however, report folate concentrations in both groups, which may indicate  
340 that they had some unexpected results, such as lower folate concentrations in their controls.

341 As far as we know, our study is the first to have compared several methods of measuring the  
342 intensity of hair redness. Our results suggest that even the simplest method, i.e., the self-  
343 rating by participants, is satisfactory. Both methods of spectrophotometric measurement of  
344 hair redness worked similarly well, although the correlation between hair redness as  
345 estimated by subjects or other observers and hair redness as measured by the CIE L\*a\*b\*  
346 color space method as the a\* parameter (and possibly also the reflectance at 650 nm) was  
347 slightly higher than the correlation with redness as R calculated from reflectance according to  
348 Reed’s function. For example, partial Kendall correlation of self-rated hair redness with hair  
349 redness as a\*, R, and reflectance at 650 nm was 0.528, 0.461, and 0.484, respectively.  
350 Similarly, correlation with calcidiol concentration was stronger for hair redness measured as  
351 the a\* parameter than with hair redness measured as R (Table 2).

352 The main limitation of the present study is that our subjects cannot be considered a random  
353 sample of general Czech population. About half of the subjects who were asked to come to  
354 our laboratory to participate in an about 40-minute-long experiment politely refused. A few  
355 also refused to provide a blood sample for serological analysis. It is possible that persons who  
356 consented to participation and actually came to the experimental session form a specific  
357 population, for instance a group of highly altruistic subjects in good mood and good physical  
358 and mental condition. It is known that certain genetic and environmental factors influence  
359 variance more than physiological variables do (Flegr, 2013). Such factors may have, for

360 example, negative effects on the health of a specific part of the population and positive  
361 effects on the health of others in the same population. If subjects who enjoy good health are  
362 more likely to be enrolled in the study (as may have been the case here), we may end up  
363 concluding that a particular factor, for instance redheadedness, has a positive effect on health  
364 and health-related variables although it has either no effect or even a negative effect on most  
365 members of a fully general population. Similarly, if subjects in poor health are more likely to  
366 be enrolled in a study – which is often the case with studies performed on patients with and  
367 without a particular disorder – a study can show that a particular factor has a negative effect  
368 on health although in majority of general population, its effect is positive. Our data suggest  
369 that such a sieve effect operated in our study, too. Firstly, latent infection with the common  
370 *Toxoplasma* parasite has a wide range of negative effects on the health of most members of  
371 the general population (Flegr & Escudero, 2016; Flegr, Prandota, Sovickova, & Israili, 2014).  
372 In our study, however, *Toxoplasma*-infected subjects enjoyed significantly better health than  
373 those who were *Toxoplasma*-free. (The effect of toxoplasmosis on health and wellbeing was a  
374 subject of another study performed on the same population of volunteers.) Secondly, a visual  
375 inspection of the violin plots for calcidiol and folic acid concentrations suggests that the  
376 distribution is truncated at the bottom and a subpopulation of individuals with a low  
377 concentration of these vitamins is missing from our sample. In a democratic country where  
378 people can refuse to participate in a study, the issue of non-representativeness of a sample  
379 due to sieve effect linked to the requirement of obtaining informed consent is hard or even  
380 impossible to avoid. It can be merely mitigated by making participation as easy and  
381 convenient as possible. It would be therefore most advisable to repeat our study on different  
382 populations of subjects who would not be selected or self-selected for better health.

383

## 384 **Conclusions**

385 Based on previous observations of impaired health in fair-skinned people (Flegr & Sykorova,  
386 2019), we predicted that redhaired subjects, who can be expected avoid sun exposure because  
387 of their sensitive skin, would have lower calcidiol levels. We confirmed that they indeed  
388 protect their skin from the sun by chemical and mechanical means. Nevertheless, we also  
389 found that in our self-selected sample, redhaired individuals did not avoid sun exposure any  
390 more than their non-redhaired peers and moreover, redhaired persons in our study had  
391 significantly higher calcidiol levels regardless of intensity of sun exposure. This discovery  
392 suggests that hair redness, the result of eumelanin synthesis downregulation, could be an



393 evolutionary adaptation to life in higher latitudes where the photosynthesis of vitamin D  
394 precursor in skin is inadequate for large part of the year due to a low intensity of solar  
395 radiation. Our results suggest that redhaired individuals are capable of synthesizing sufficient  
396 amounts of calcidiol even when their sun exposure is minimal. Nonetheless, we should be  
397 cautious about generalizing this observation. This phenomenon was observed in two medium-  
398 sized samples of 93 men and 110 women who passed a relatively stringent self-selection  
399 process. Until this phenomenon is demonstrated in other, more representative populations,  
400 our conclusions must be considered merely preliminary.

401

402 **Acknowledgment.** We would like to thank Anna Pilátová, Ph.D. for final revisions of our  
403 text. The study was supported by the Grant Agency of Charles University (project no.  
404 1494218) and the Czech Science Foundation (grant No. 18-13692S).

405

## 406 **References**

- 407 Almohanna, H. M., Ahmed, A. A., Tsatalis, J. P., & Tosti, A. (2019). The role of vitamins  
408 and minerals in hair loss: A review. *Dermatology and Therapy*, *9*(1), 51-70.  
409 doi:10.1007/s13555-018-0278-6
- 410 Benjamini, Y., & Hochberg, Y. (1995). Controlling the false discovery rate: A practical and  
411 powerful approach to multiple testing. *Journal of the Royal Statistical Society Series*  
412 *B-Methodological*, *57*(1), 289-300.
- 413 Branda, R. F., & Eaton, J. W. (1978). Skin color and nutrient photolysis - Evolutionary  
414 hypothesis. *Science*, *201*(4356), 625-626. doi:DOI 10.1126/science.675247
- 415 Ding, Q. L., Hu, Y., Xu, S. H., Wang, C. C., Li, H., Zhang, R. Y., . . . Jin, L. (2014).  
416 Neanderthal origin of the haplotypes carrying the functional variant Val92Met in the  
417 MC1R in modern humans. *Molecular Biology and Evolution*, *31*(8), 1994-2003.  
418 doi:10.1093/molbev/msu180
- 419 Durusoy, C., Ozenli, Y., Adiguzel, A., Budakoglu, I. Y., Tugal, O., Arikan, S., . . . Gulec, A.  
420 T. (2009). The role of psychological factors and serum zinc, folate and vitamin B12  
421 levels in the aetiology of trichodynia: a case-control study. *Clin Exp Dermatol*, *34*(7),  
422 789-792. doi:10.1111/j.1365-2230.2008.03165.x
- 423 Flegr, J. (2013). Influence of latent *Toxoplasma* infection on human personality, physiology  
424 and morphology: pros and cons of the *Toxoplasma*-human model in studying the  
425 manipulation hypothesis. *Journal of Experimental Biology*, *216*(1), 127-133.  
426 doi:10.1242/jeb.073635
- 427 Flegr, J., & Escudero, D. Q. (2016). Impaired health status and increased incidence of  
428 diseases in *Toxoplasma*-seropositive subjects - an explorative cross-sectional study.  
429 *Parasitology*, *143*(14), 1974-1989. doi:10.1017/s0031182016001785
- 430 Flegr, J., Prandota, J., Sovickova, M., & Israili, Z. H. (2014). Toxoplasmosis - A global  
431 threat. Correlation of latent toxoplasmosis with specific disease burden in a set of 88  
432 countries. *PLoS ONE*, *9*(3). doi:10.1371/journal.pone.0090203

- 433 Flegr, J., & Sykorova, K. (2019). Skin fairness is a better predictor for impaired physical and  
434 mental health than hair redness *Scientific Reports*, *in press*.
- 435 Frost, P. (2006). European hair and eye color - A case of frequency-dependent sexual  
436 selection? *Evolution and Human Behavior*, *27*, 85-103.
- 437 Frost, P., Kleisner, K., & Flegr, J. (2017). Health status by gender, hair color, and eye color:  
438 Red-haired women are the most divergent. *PLoS ONE*, *12*(12).  
439 doi:10.1371/journal.pone.0190238
- 440 Guo, E. L., & Katta, R. (2017). Diet and hair loss: effects of nutrient deficiency and  
441 supplement use. *Dermatol Pract Concept*, *7*(1), 1-10. doi:10.5826/dpc.0701a01
- 442 Hooton, E. A. (1940). Stature, head form, and pigmentation of adult male Irish. *American*  
443 *Journal of Physical Anthropology*, *26*(1), 229-249. doi:doi:10.1002/ajpa.1330260131
- 444 Chen, X., Chen, H., Cai, W., Maguire, M., Ya, B., Zuo, F., . . . Schwarzschild, M. A. (2017).  
445 The melanoma-linked "redhead" MC1R influences dopaminergic neuron survival.  
446 *Annals of Neurology*, *81*(3), 395-406. doi:10.1002/ana.24852
- 447 Jablonski, N. G., & Chaplin, G. (2000). The evolution of human skin coloration. *Journal of*  
448 *Human Evolution*, *39*(1), 57-106. doi:DOI 10.1006/jhev.2000.0403
- 449 Jones, P., Lucock, M., Veysey, M., & Beckett, E. (2018). The vitamin D-folate hypothesis as  
450 an evolutionary model for skin pigmentation: An update and integration of current  
451 ideas. *Nutrients*, *10*(5). doi:10.3390/nu10050554
- 452 Kim, S. (2015). ppcor: An R package for a fast calculation to semi-partial correlation  
453 coefficients. *Commun. Stat. Appl. Methods*, *22*(6), 665-674. doi:doi:  
454 10.5351/CSAM.2015.22.6.665
- 455 Liem, E. B., Hollensead, S. C., Joiner, T. V., & Sessler, D. I. (2006). Women with red hair  
456 report a slightly increased rate of bruising but have normal coagulation tests.  
457 *Anesthesia and Analgesia*, *102*(1), 313-318.  
458 doi:10.1213/01.ANE.0000180769.51576.CD
- 459 Lozano, I., Saunier, J. B., Panhard, S., & Loussouarn, G. (2017). The diversity of the human  
460 hair colour assessed by visual scales and instrumental measurements. A worldwide  
461 survey. *International Journal of Cosmetic Science*, *39*(1), 101-107.  
462 doi:10.1111/ics.12359
- 463 Missmer, S. A., Spiegelman, D., Hankinson, S. E., Malspeis, S., Barbieri, R. L., & Hunter, D.  
464 J. (2006). Natural hair color and the incidence of endometriosis. *Fertility and Sterility*,  
465 *85*(4), 866-870. doi:10.1016/j.fertnstert.2005.12.008
- 466 R Core Team. (2018). *R: A language and environment for statistical computing*. R  
467 *Foundation for Statistical Computing*. In. Retrieved from <https://www.R-project.org/>
- 468 Reed, T. E. (1952). Red hair colour as a genetical character. *Annals of Eugenics*, *17*(2), 115-  
469 139.
- 470 Rushton, D. H. (2002). Nutritional factors and hair loss. *Clin Exp Dermatol*, *27*(5), 400-408.
- 471 Skobowiat, C., Postlethwaite, A. E., & Slominski, A. T. (2017). Skin exposure to ultraviolet  
472 B rapidly activates systemic neuroendocrine and immunosuppressive responses.  
473 *Photochemistry and Photobiology*, *93*(4), 1008-1015. doi:10.1111/php.12642
- 474 Slominski, A., & Postlethwaite, A. E. (2015). Skin under the sun: When melanin pigment  
475 meets vitamin D. *Endocrinology*, *156*(1), 1-4. doi:10.1210/en.2014-1918
- 476 Slominski, A. T., Kim, T. K., Li, W., & Tuckey, R. C. (2016). Classical and non-classical  
477 metabolic transformation of vitamin D in dermal fibroblasts. *Experimental*  
478 *Dermatology*, *25*(3), 231-232. doi:10.1111/exd.12872
- 479 Somigliana, E., Vigano, P., Abbiati, A., Gentilini, D., Parazzini, F., Benaglia, L., . . . Fedele,  
480 L. (2010). 'Here comes the sun': pigmentary traits and sun habits in women with  
481 endometriosis. *Human Reproduction*, *25*(3), 728-733. doi:10.1093/humrep/dep453

- 482 Sunderland, E., & Barnicot, N. A. (1956). Hair-colour variation in the United Kingdom.  
483 *Annals of Human Genetics*, 20(4), 312-333.
- 484 Tell-Marti, G., Puig-Butille, J. A., Potrony, M., Badenas, C., Mila, M., Malvehy, J., . . . Puig,  
485 S. (2015). The MC1R melanoma risk variant p.R160W is associated with Parkinson  
486 disease. *Annals of Neurology*, 77(5), 889-894. doi:10.1002/ana.24373
- 487 Vaughn, M., van Oorschot, R., & Baidur-Hudson, S. (2008). Hair color measurement and  
488 variation. *American Journal of Physical Anthropology*, 137(1), 91-96.  
489 doi:10.1002/ajpa.20849

490

491 **Data Accessibility:**

492 The final raw data set is available at figshare: <https://figshare.com/s/50f5d6145b93a9892801>

493 **Author contributions:**

494 JF, and KS designed research; KS, VF, JH, MB, LM, ŠK performed research, JF analyzed  
495 data and wrote the paper.
